# Supplementary material for: Novel Zn(ii), Co(ii) and Cu(ii) diflunisalato complexes with neocuproine and their exceptional antiproliferative activity against cancer cell lines
Source: Royal Society of Chemistry journal article supplement (doi:10.1039/d4dt01736f), 2024-01-01
Supplement: d4dt01736f1.pdf [file d4dt01736f1.pdf]

# Novel Zn(II), Co(II) and Cu(II) diflunisalato complexes with neocuproine and their exceptional antiproliferative activity against cancer cell lines

Romana Smolková,<sup>\*a</sup> Lukáš Smolko,<sup>b</sup> Erika Samořlová,<sup>c</sup> Ibrahim Morgan,<sup>d</sup> Robert Rennert<sup>d</sup> and Goran N. Kaluđerović<sup>e</sup>

## Electronic Supplementary Information (ESI)

### Table of Contents

**Fig. S1** Comparison of solid-state FT-IR ATR spectra of **1**, **2** and **3**.

**Fig. S2** Absorption spectra of DMSO solutions of **1**, **2** and **3** in the UV (left, 10  $\mu$ M) and visible region (right, 1000  $\mu$ M).

**Fig. S3** Excitation-emission matrices (EEMs) of complex **1** (left), **2** (middle) and **3** (right) in 10  $\mu$ M DMSO solutions.

**Fig. S4** Excitation-emission matrices (EEMs) of complex **1** (left), **2** (middle) and **3** (right) in 10  $\mu$ M aqueous solutions.

**Fig. S5** Crystal packing of **1** (top) and **2** (bottom) showing intermolecular interactions.

**Fig. S6** Crystal packing of **3** showing intermolecular interactions.

**Fig. S7** Hirshfeld surface showing shape index (left) and curvedness (right) for complex **1** (top) and **2** (bottom).

**Fig. S8** Hirshfeld surface showing shape index (left) and curvedness (right) for complex **3**.

**Fig. S9** Autophagic response of the PC-3 cells.

**Fig. S10** Effect of **2** on induction of apoptosis in PC-3 cell line.

**Fig. S11** Fluorescence emission spectra of DNA-EB complex prepared by using isolated genomic DNA samples.

**Fig. S12** Fluorescence emission spectra of HSA ( $\lambda_{\text{ex}} = 295$  nm) upon addition of complexes **1** (left) and **2** (right).

**Fig. S13** Visualization of the DNA docking experiments showing complex **1** in DNA (PDB 1Z3F).

**Fig. S14** Visualization of molecular docking of **1-3** within the structure of human serum albumin (PDB 2bxo).

**Table S1** Crystal data and structure refinement for complexes **1**, **2** and **3**.

**Table S2** Selected bond lengths and angles (A, °) for **1**, **2** and **3**.

**Table S3** Possible hydrogen bonding interactions (A, °) for **1** and **2**.

**Table S4** Selected  $\pi$ - $\pi$  interactions (A, °) for **1** and **2**.

**Table S5** Possible hydrogen bonding interactions (A, °) for **3**.

**Table S6** Selected  $\pi$ - $\pi$  interactions (A, °) for **3**.

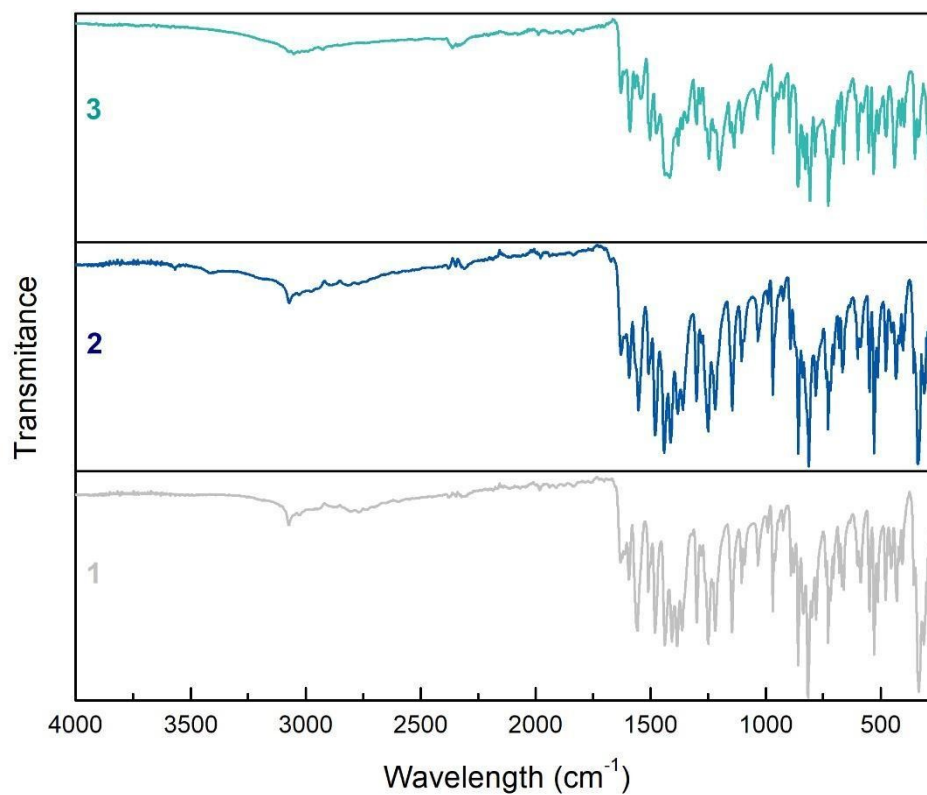

**Fig. S1** Comparison of solid-state FT-IR ATR spectra of **1**, **2** and **3**.

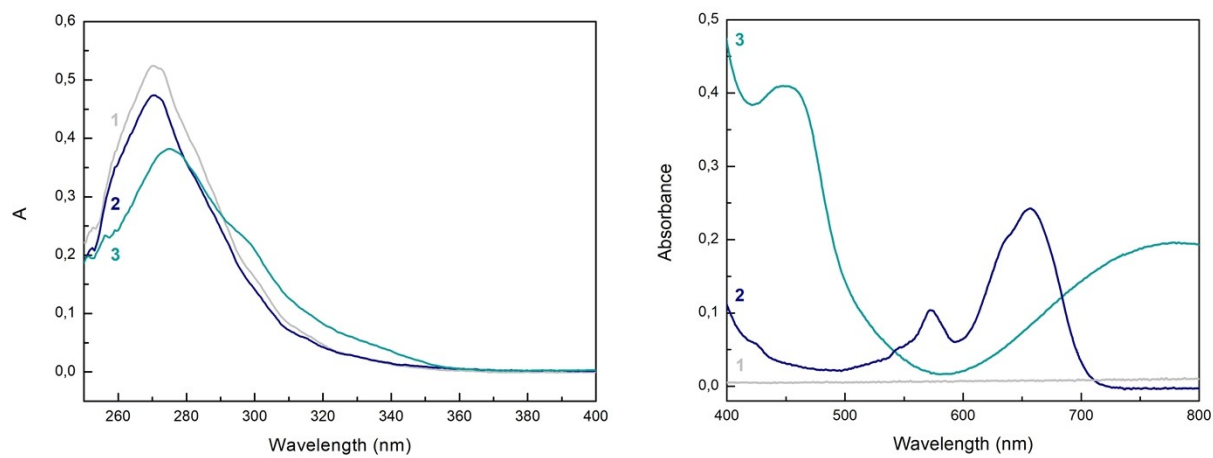

**Fig. S2** Absorption spectra of DMSO solutions of **1**, **2** and **3** in the UV (left, 10  $\mu$ M) and visible region (right, 1000  $\mu$ M).

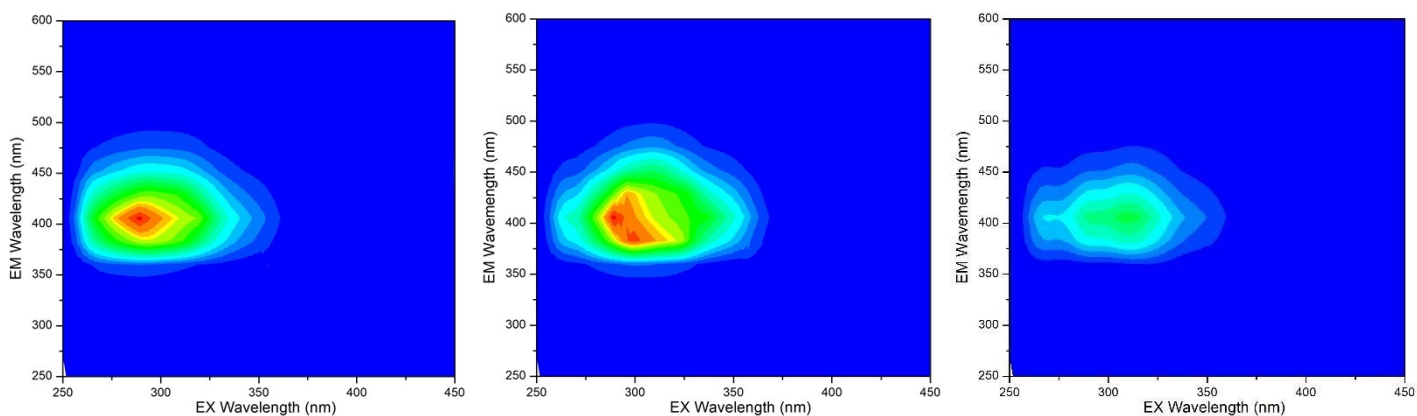

**Fig. S3** Excitation-emission matrices (EEMs) of complex **1** (left), **2** (middle) and **3** (right) in 10  $\mu$ M DMSO solutions adjusted to the same intensity colour scale for better comparison (Rayleigh and Raman scattering is masked).

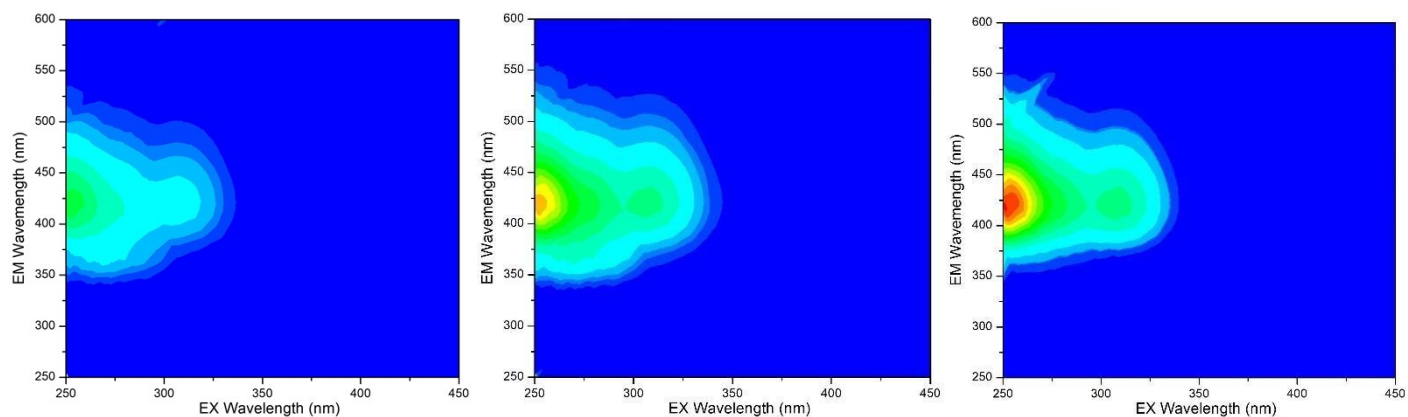

**Fig. S4** Excitation-emission matrices (EEMs) of complex **1** (left), **2** (middle) and **3** (right) in 10  $\mu$ M aqueous solutions adjusted to the same intensity colour scale for better comparison (Rayleigh and Raman scattering is masked).

**Table S1** Crystal data and structure refinement for complexes **1**, **2** and **3**.

| Compound                                                      | <b>1</b>                                                                                                     | <b>2</b>                                                                                                     | <b>3</b>                                                                                                     |
|---------------------------------------------------------------|--------------------------------------------------------------------------------------------------------------|--------------------------------------------------------------------------------------------------------------|--------------------------------------------------------------------------------------------------------------|
| CCDC reference number                                         | <b>2345890</b>                                                                                               | <b>2345891</b>                                                                                               | <b>2345892</b>                                                                                               |
| Empirical formula                                             | C <sub>27</sub> H <sub>19</sub> N <sub>2</sub> O <sub>3</sub> F <sub>2</sub> Cl <sub>1</sub> Zn <sub>1</sub> | C <sub>27</sub> H <sub>19</sub> N <sub>2</sub> O <sub>3</sub> F <sub>2</sub> Cl <sub>1</sub> Co <sub>1</sub> | C <sub>27</sub> H <sub>18</sub> N <sub>2</sub> O <sub>3</sub> F <sub>2</sub> Cl <sub>1</sub> Cu <sub>1</sub> |
| Formula weight                                                | 558.3                                                                                                        | 551.8                                                                                                        | 555.4                                                                                                        |
| Temperature [K]                                               | 120                                                                                                          | 120                                                                                                          | 120                                                                                                          |
| Wavelength [Å]                                                | 1.54184                                                                                                      | 1.54184                                                                                                      | 1.54184                                                                                                      |
| Crystal System                                                | monoclinic                                                                                                   | monoclinic                                                                                                   | triclinic                                                                                                    |
| Space Group                                                   | <i>P</i> 2 <sub>1</sub> / <i>n</i>                                                                           | <i>P</i> 2 <sub>1</sub> / <i>n</i>                                                                           | <i>P</i> -1                                                                                                  |
| <i>a</i> [Å]                                                  | 11.5013(1)                                                                                                   | 11.6277(7)                                                                                                   | 9.4922(3)                                                                                                    |
| <i>b</i> [Å]                                                  | 12.6985(1)                                                                                                   | 12.6340(5)                                                                                                   | 9.7102(3)                                                                                                    |
| <i>c</i> [Å]                                                  | 15.3433(1)                                                                                                   | 15.2269(7)                                                                                                   | 13.8187(4)                                                                                                   |
| $\alpha$ [°]                                                  | 90                                                                                                           | 90                                                                                                           | 90.538(3)                                                                                                    |
| $\beta$ [°]                                                   | 95.733(1)                                                                                                    | 95.864(4)                                                                                                    | 97.661(2)                                                                                                    |
| $\gamma$ [°]                                                  | 90                                                                                                           | 90                                                                                                           | 115.412(3)                                                                                                   |
| Volume [Å <sup>3</sup> ]                                      | 2229.67(3)                                                                                                   | 2225.19(19)                                                                                                  | 1137.02(7)                                                                                                   |
| Z                                                             | 4                                                                                                            | 4                                                                                                            | 2                                                                                                            |
| $\rho$ (calculated) [g.cm <sup>-3</sup> ]                     | 1.6631                                                                                                       | 1.6472                                                                                                       | 1.6224                                                                                                       |
| $\mu$ [mm <sup>-1</sup> ]                                     | 3.09                                                                                                         | 0.944                                                                                                        | 2.885                                                                                                        |
| F000                                                          | 1136                                                                                                         | 1124                                                                                                         | 567                                                                                                          |
| Crystal colour and shape                                      | colourless needle                                                                                            | blue prism                                                                                                   | brown prism                                                                                                  |
| Crystal dimensions [mm]                                       | 0.32 × 0.18 × 0.17                                                                                           | 0.12 × 0.10 × 0.08                                                                                           | 0.21 × 0.17 × 0.10                                                                                           |
| $\vartheta$ range for data collection [°]                     | 4.53 – 67.54                                                                                                 | 3.14 – 28.59                                                                                                 | 3.24 – 67.36                                                                                                 |
| Reflections collected                                         | 48200                                                                                                        | 29802                                                                                                        | 24668                                                                                                        |
| Independent reflections                                       | 4023                                                                                                         | 5344                                                                                                         | 4077                                                                                                         |
| <i>R</i> <sub>int</sub>                                       | 0.0326                                                                                                       | 0.0400                                                                                                       | 0.0521                                                                                                       |
| Data/restraints/parameters                                    | 4023/0/329                                                                                                   | 5344/0/329                                                                                                   | 4077/0/339                                                                                                   |
| Goodness-of-fit*                                              | 2.79                                                                                                         | 1.77                                                                                                         | 1.94                                                                                                         |
| Final <i>R</i> indices ( <i>I</i> > 3 $\sigma$ / <i>I</i> )   | <i>R</i> 1 = 0.0312<br><i>wR</i> 2 = 0.0848                                                                  | <i>R</i> 1 = 0.0368<br><i>wR</i> 2 = 0.0785                                                                  | <i>R</i> 1 = 0.0380<br><i>wR</i> 2 = 0.0874                                                                  |
| <i>R</i> indices (all data)                                   | <i>R</i> 1 = 0.0329<br><i>wR</i> 2 = 0.0853                                                                  | <i>R</i> 1 = 0.0527<br><i>wR</i> 2 = 0.0818                                                                  | <i>R</i> 1 = 0.0433<br><i>wR</i> 2 = 0.0896                                                                  |
| Max. and min. residual electron density [e. Å <sup>-3</sup> ] | 0.63; -0.66                                                                                                  | 0.93; -0.53                                                                                                  | 0.91; -0.41                                                                                                  |

\* The program JANA does not refine the weighting scheme to reach Goodness of fit close to 1. The displayed GOF corresponds to the experimental weighting scheme with the instability factor as an instrumental parameter.

**Table S2** Selected bond lengths and angles (A, °) for **1**, **2** and **3**.

| Complex   | <b>1</b> (M = Zn) | <b>2</b> (M = Co) | <b>3</b> (M = Cu) |
|-----------|-------------------|-------------------|-------------------|
| M1-O1     | 1.962(1)          | 1.977(1)          | 1.963(2)          |
| M1-O2     | 2.873(2)*         | 2.660(2)*         | 2.308(2)          |
| M1-N1     | 2.051(2)          | 2.038(2)          | 1.993(2)          |
| M1-N2     | 2.082(2)          | 2.075(2)          | 2.039(2)          |
| M1-Cl1    | 2.193(1)          | 2.221(1)          | 2.313(1)          |
| O1-M1-O2  | -                 | -                 | 60.94(7)          |
| N1-M1-N2  | 81.60(7)          | 81.83(7)          | 82.97(8)          |
| O1-M1-N1  | 106.05(6)         | 109.27(6)         | 152.62(8)         |
| O1-M1-N2  | 128.21(6)         | 135.16(6)         | 98.66(8)          |
| O2-M1-N1  | -                 | -                 | 100.15(8)         |
| O2-M1-N2  | -                 | -                 | 138.97(7)         |
| Cl1-M1-O1 | 105.02(4)         | 101.18(4)         | 96.28(6)          |
| Cl1-M1-O2 | -                 | -                 | 97.36(5)          |
| Cl1-M1-N1 | 119.77(5)         | 116.63(5)         | 106.26(6)         |
| Cl1-M1-N2 | 115.10(5)         | 112.36(5)         | 121.26(6)         |

\* M1-O2 distance is too long to be considered as a standard coordination bond

**Table S3** Possible hydrogen bonding interactions (A, °) for **1** and **2**.

| D-H...A                        | d(D-H)  | d(H...A) | d(D...A) | <(DHA) |
|--------------------------------|---------|----------|----------|--------|
| <b>1</b>                       |         |          |          |        |
| O3-H1O3...O2                   | 0.82(4) | 1.81(3)  | 2.565(2) | 153(3) |
| C10-H1C10...O2 <sup>i</sup>    | 0.96    | 2.26     | 3.175(3) | 159    |
| C4-H1C4...Cl1 <sup>ii</sup>    | 0.96    | 2.69     | 3.455(2) | 137    |
| C16-H1C16...Cl1 <sup>iii</sup> | 0.96    | 2.75     | 3.653(2) | 157    |
| <b>2</b>                       |         |          |          |        |
| O3-H1O3...O2                   | 0.76(2) | 1.91(2)  | 2.594(2) | 150(2) |
| C10-H1C10...O2 <sup>i</sup>    | 0.96    | 2.30     | 3.215(3) | 160    |
| C4-H1C4...Cl1 <sup>ii</sup>    | 0.96    | 2.68     | 3.463(2) | 139    |
| C16-H1C16...Cl1 <sup>iii</sup> | 0.96    | 2.76     | 3.658(2) | 157    |

Symmetry code: (i)  $\frac{1}{2}+x, \frac{1}{2}-y, \frac{1}{2}+z$ ; (ii)  $\frac{1}{2}+x, \frac{1}{2}-y, -\frac{1}{2}+z$ ; (iii)  $-\frac{1}{2}+x, \frac{1}{2}-y, -\frac{1}{2}+z$

**Table S4** Selected  $\pi$ - $\pi$  interactions (A, °) for **1** and **2**.

| Cg(I)···Cg(J)           | d(Cg···Cg) | $\alpha$ | $\beta$ | $\gamma$ |
|-------------------------|------------|----------|---------|----------|
| <b>1</b>                |            |          |         |          |
| Cg3···Cg2 <sup>i</sup>  | 3.809(1)   | 5.48(10) | 28.6    | 25.4     |
| Cg2···Cg1 <sup>iv</sup> | 3.892(1)   | 8.11(10) | 20.6    | 28.7     |
| <b>2</b>                |            |          |         |          |
| Cg3···Cg2 <sup>i</sup>  | 3.794(1)   | 5.77(10) | 24.1    | 27.9     |
| Cg2···Cg1 <sup>iv</sup> | 3.885(1)   | 8.54(10) | 19.9    | 28.4     |

Symmetry code: (i)  $\frac{1}{2}+x, \frac{1}{2}-y, \frac{1}{2}+z$ ; (iv)  $-x, 1-y, 1-z$ 

Aromatic rings centres of gravity: Cg1 (N1-C14-C15-C16-C17-C25); Cg2 (N2-C23-C22-C21-C20-C24); Cg3 (C8-C9-C10-C11-C12-C13)

**Table S5** Possible hydrogen bonding interactions (A, °) for **3**.

| D-H···A                      | d(D-H)  | d(H···A) | d(D···A) | $\angle$ (DHA) |
|------------------------------|---------|----------|----------|----------------|
| <b>3</b>                     |         |          |          |                |
| O3-H1O3···O2                 | 0.77(5) | 1.96(5)  | 2.628(3) | 146(5)         |
| O3-H1O3···O3 <sup>v</sup>    | 0.77(5) | 2.40(5)  | 2.778(3) | 112(5)         |
| C21-H1C21···Cl <sup>vi</sup> | 0.96    | 2.86     | 3.615(3) | 136            |
| C19-H1C19···Cl <sup>iv</sup> | 0.96    | 2.83     | 3.592(3) | 137            |

Symmetry code: (iv)  $-x, 1-y, 1-z$ ; (v)  $-x, -y, -z$ ; (vi)  $x, -1+y, z$ **Table S6** Selected  $\pi$ - $\pi$  interactions (A, °) for **3**.

| Cg(I)···Cg(J)            | d(Cg···Cg) | $\alpha$ | $\beta$ | $\gamma$ |
|--------------------------|------------|----------|---------|----------|
| <b>3</b>                 |            |          |         |          |
| Cg2···Cg1 <sup>iv</sup>  | 3.485(2)   | 1.69(11) | 11.7    | 10.3     |
| Cg3···Cg2 <sup>vii</sup> | 3.642(1)   | 9.13(12) | 22.6    | 18.9     |

Symmetry code: (iv)  $-x, 1-y, 1-z$ ; (vii)  $1+x, y, z$ 

Aromatic rings centres of gravity: Cg1 (C17-C18-C19-C20-C24-C25); Cg2 (N2-C23-C22-C21-C20-C24); Cg3 (C8-C9-C10-C11-C12-C13)

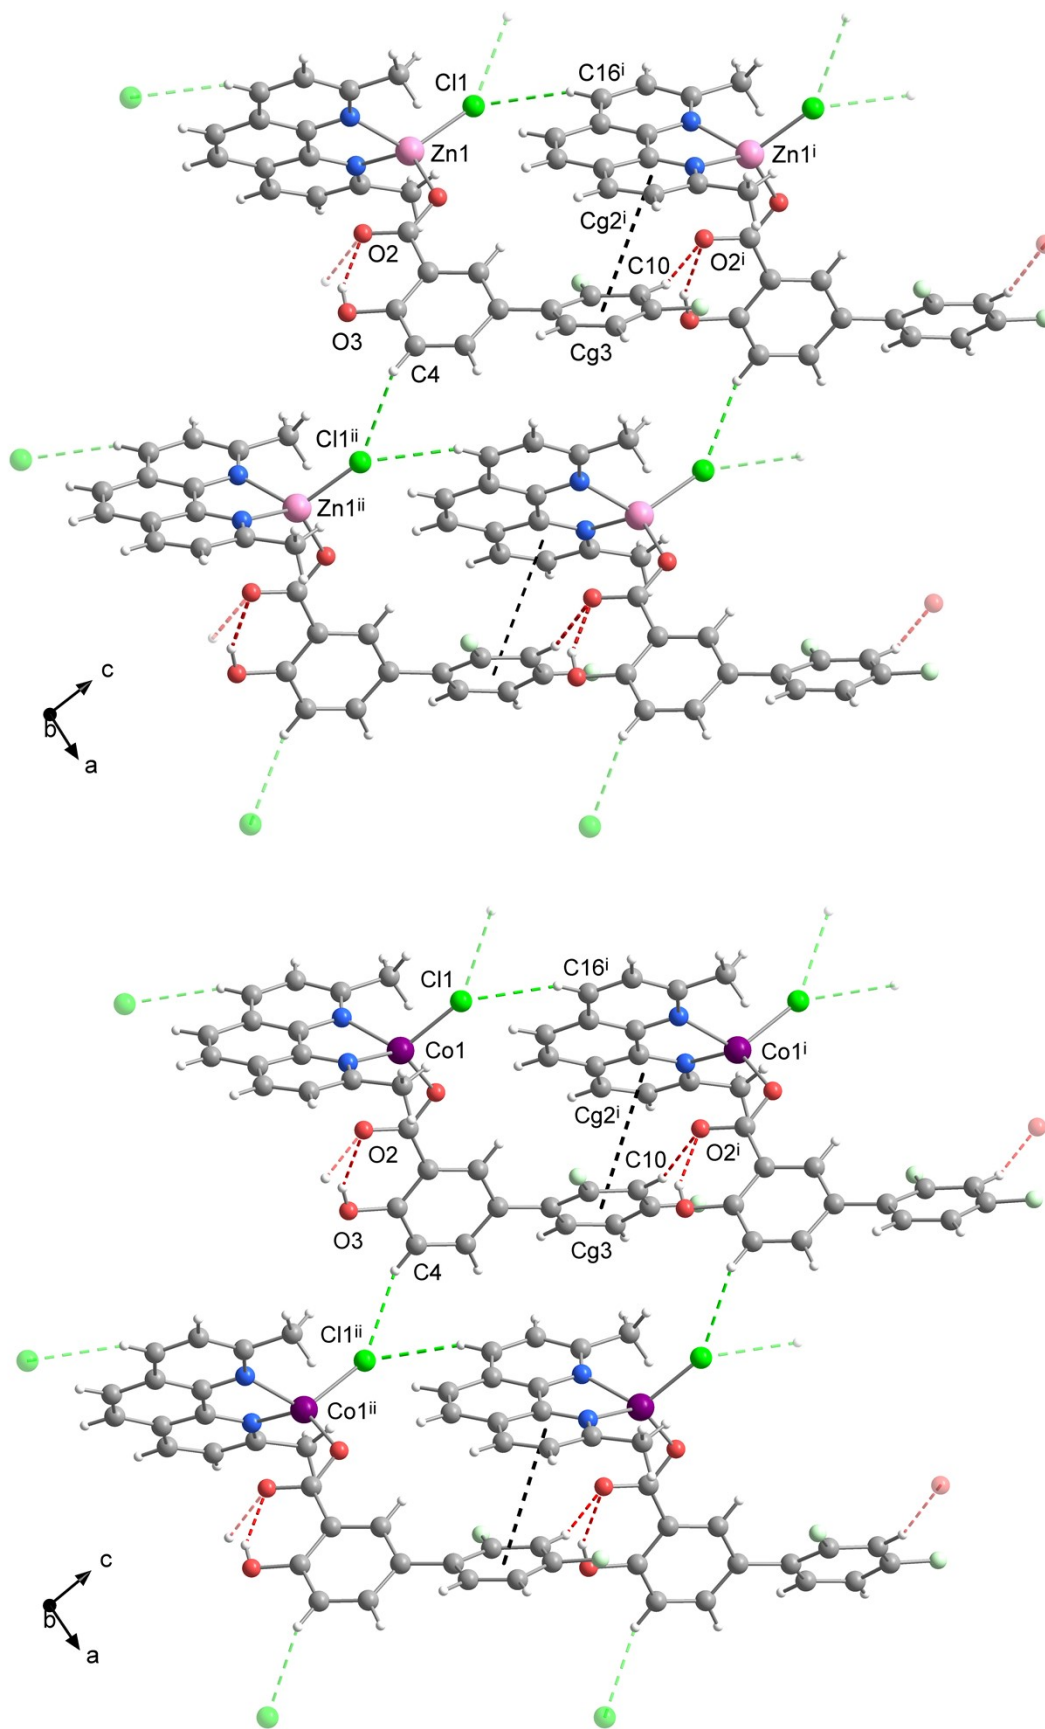

**Fig. S5** Crystal packing of **1** (top) and **2** (bottom) showing intermolecular interactions linking complex molecules into supramolecular planes parallel to *ac*. Black dashed lines represent  $\pi$ - $\pi$  stacking interactions, red and green dashed lines represent O-H $\cdots$ O, C-H $\cdots$ O and C-H $\cdots$ Cl hydrogen bonding interactions, respectively. Symmetry codes: (i)  $\frac{1}{2}+x, \frac{1}{2}-y, \frac{1}{2}+z$ ; (ii)  $\frac{1}{2}+x, \frac{1}{2}-y, -\frac{1}{2}+z$ .

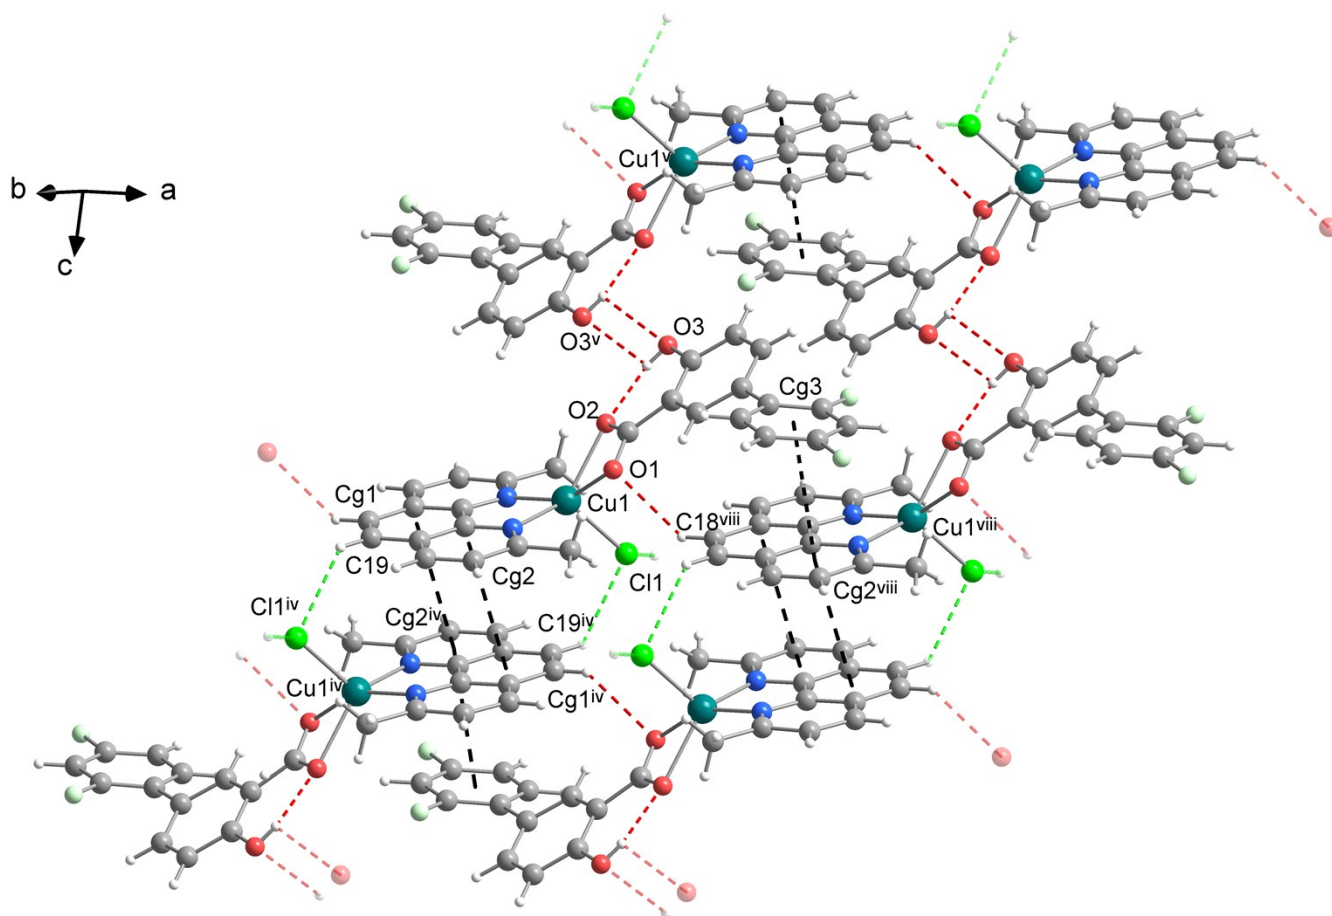

**Fig. S6** Crystal packing of **3** showing intermolecular interactions linking complex molecules into supramolecular planes parallel to *ac*. Black dashed lines represent  $\pi$ - $\pi$  stacking interactions, red and green dashed lines represent O-H $\cdots$ O, C-H $\cdots$ O and C-H $\cdots$ Cl hydrogen bonding interactions, respectively. Symmetry codes: (iv)  $-x, 1-y, 1-z$ ; (v)  $-x, -y, -z$ ; (viii).



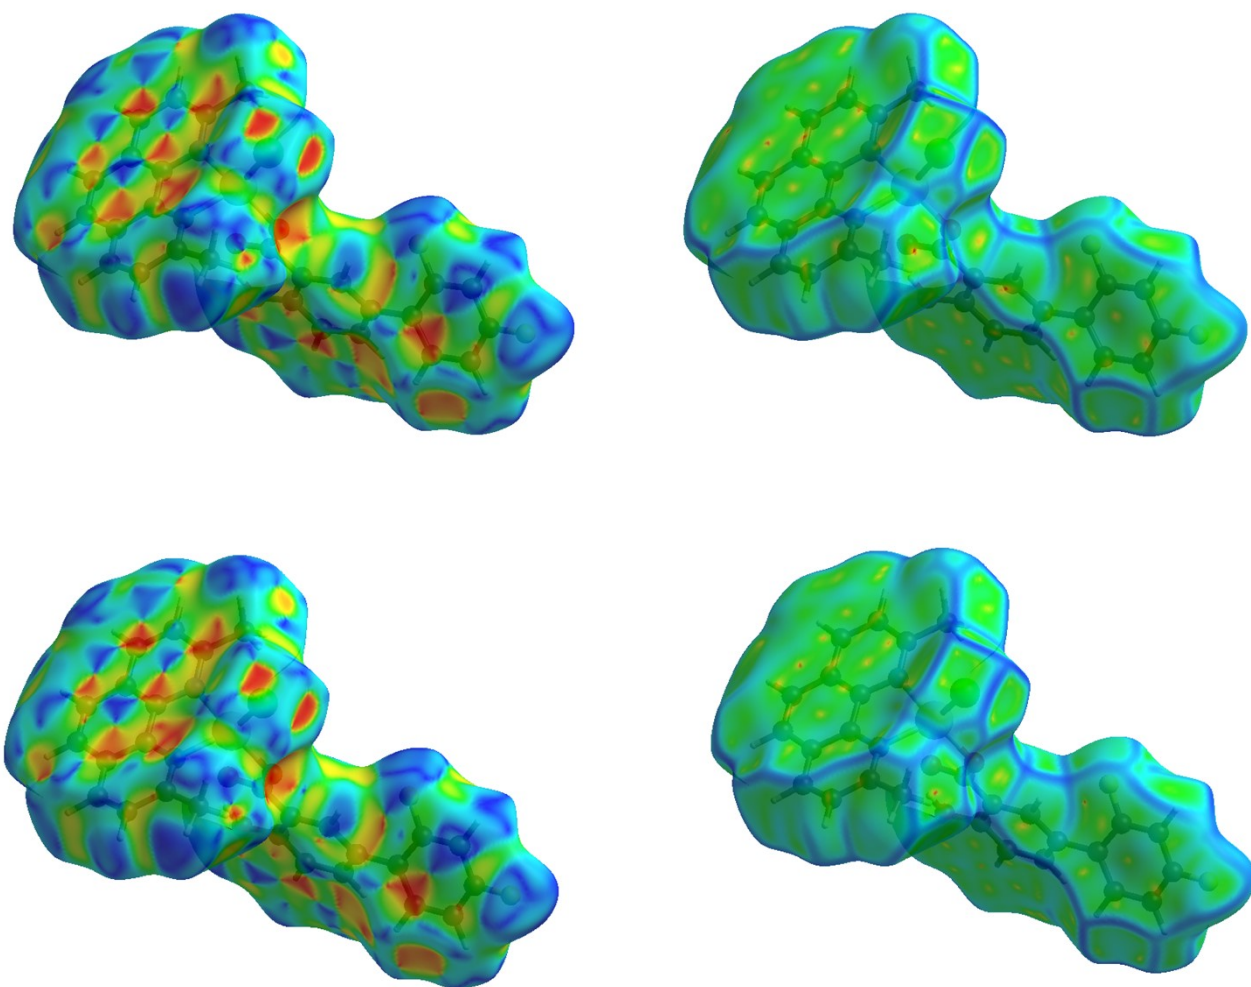

**Fig. S7** Hirshfeld surface showing shape index (left) and curvedness (right) for complex **1** (top) and **2** (bottom). The surface is visualized as transparent for the sake of clarity.

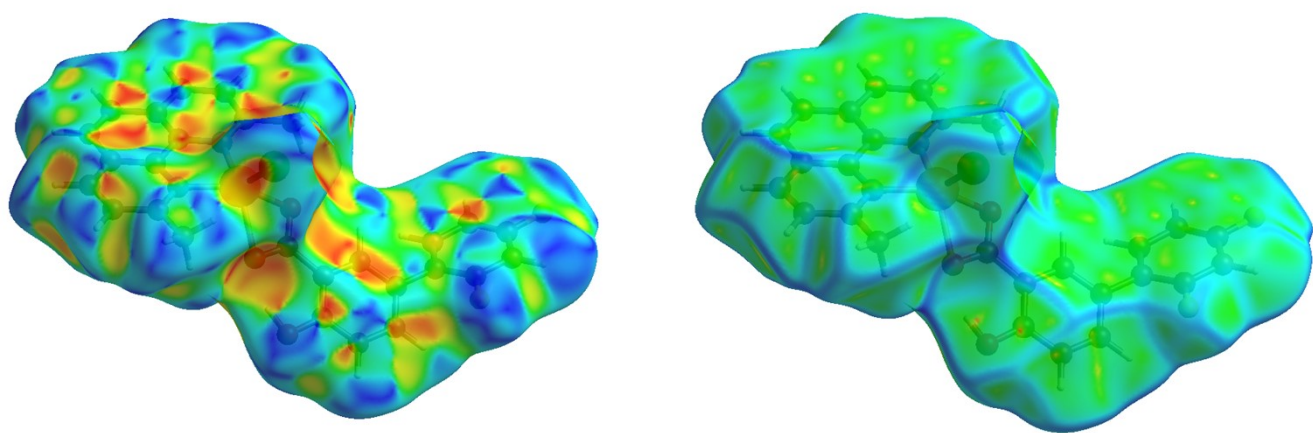

**Fig. S8** Hirshfeld surface showing shape index (left) and curvedness (right) for complex **3**. The surface is visualized as transparent for the sake of clarity.

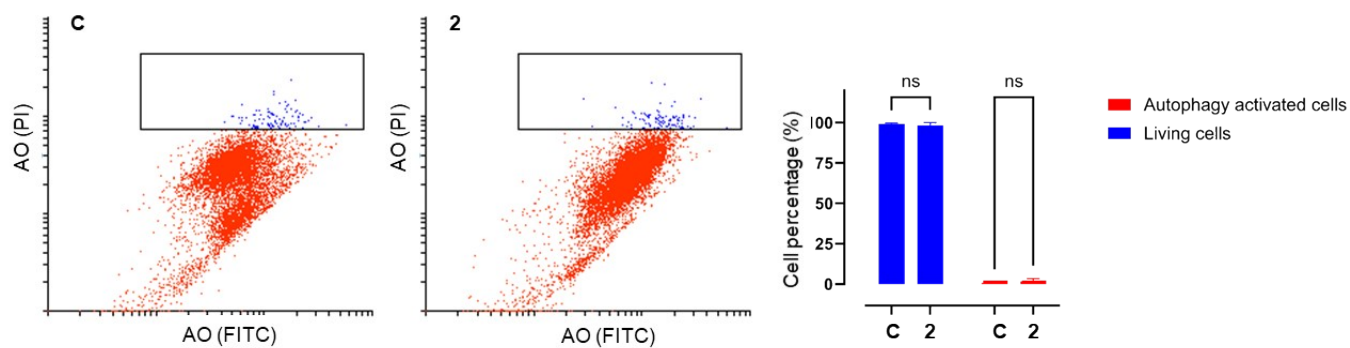

**Fig. S9** Autophagic response of the PC-3 cells (48 h treatment; **C** = control, **2** = [CoCl(*dif*)(*neo*)).

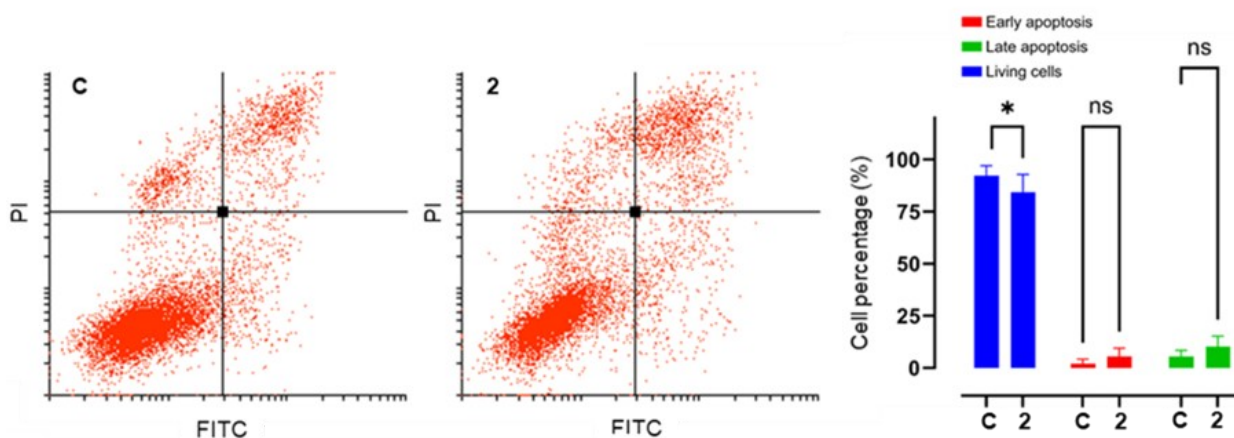

**Fig. S10** Effect of **2** on induction of apoptosis in PC-3 cell line (48 h treatment; **C** = control, **2** = [CoCl(*dif*)(*neo*)).

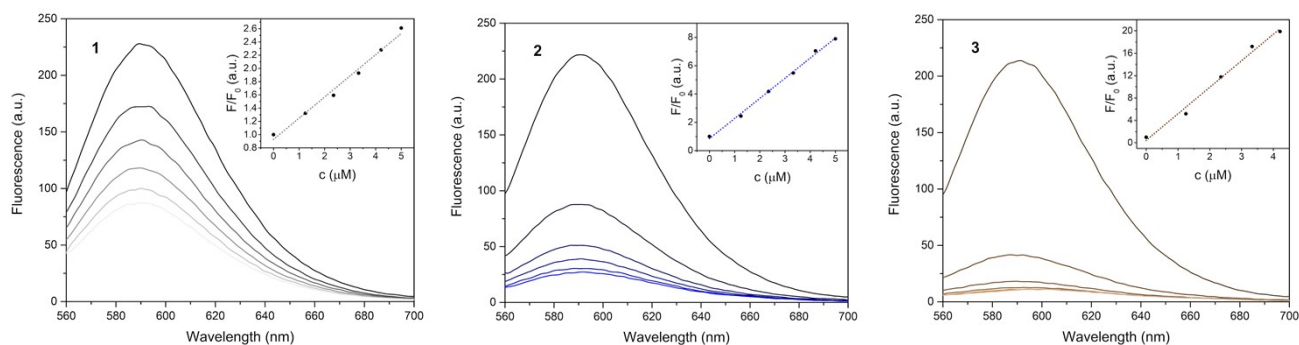

**Fig. S11** Fluorescence emission spectra of DNA-EB complex ( $\lambda_{ex} = 520$  nm) prepared by using isolated genomic DNA samples from studied cell lines PC3 (top), HCT116 (middle) and MDA-MB-468 (bottom) upon gradual addition of studied complexes (1 = gray, 2 = blue, 3 = brown) in the concentration range 0 – 5  $\mu$ M.

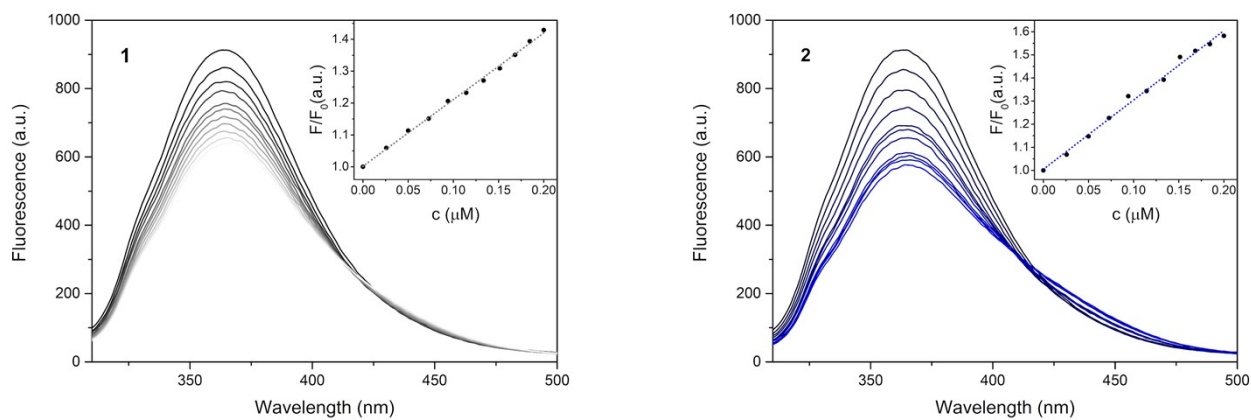

**Fig. S12** Fluorescence emission spectra of HSA ( $\lambda_{\text{ex}} = 295 \text{ nm}$ ) upon addition of complexes **1** (left) and **2** (right). Insets show the linear-fitted Stern-Volmer plots.

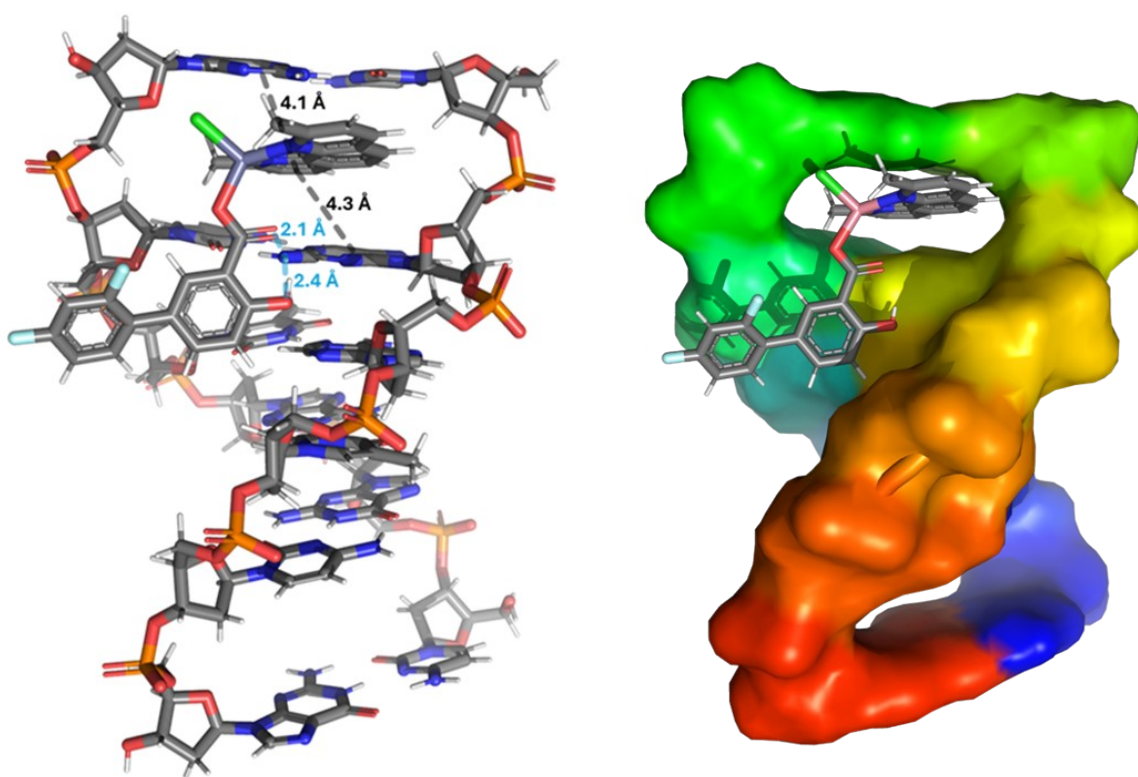

**Fig. S13** Visualization of the DNA docking experiments showing complex **1** in DNA (PDB 1Z3F). The hydrogen bonds are shown as blue dashed lines and  $\pi$ - $\pi$  stacking interactions are black. DNA surface with intercalating molecules is shown on the left.

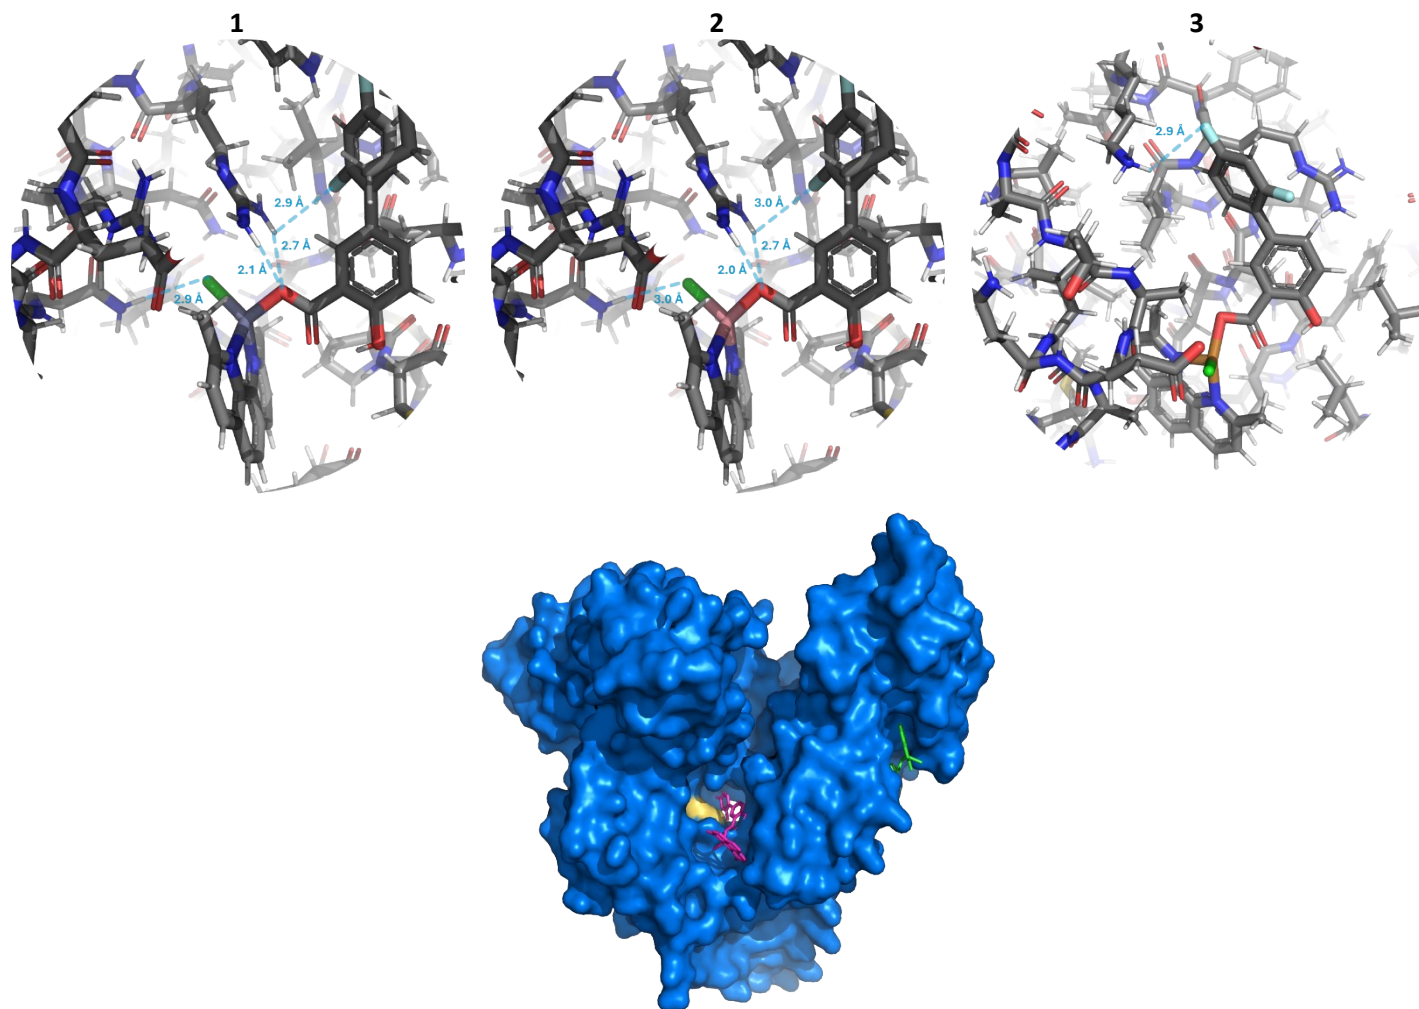

**Fig. S14** Visualization of molecular docking of **1-3** within the structure of human serum albumin (PDB 2bx) showing intermolecular interactions (blue dashed lines) with neighbouring amino acid residues and view of different predominant binding sites of **1** and **2** (magenta) and **3** (green), respectively. Yellow colour represents the tryptophan residue.
